# Supplementary material
Source: Springer Nature journal article supplement (https://www.springermedizin.de/resource/supplementary/12889_2012_3987_MOESM1_ESM.pdf/9491124)

**Figure 1** - Sampling procedure of the study participants in each Health institutions of Gondar town -----8

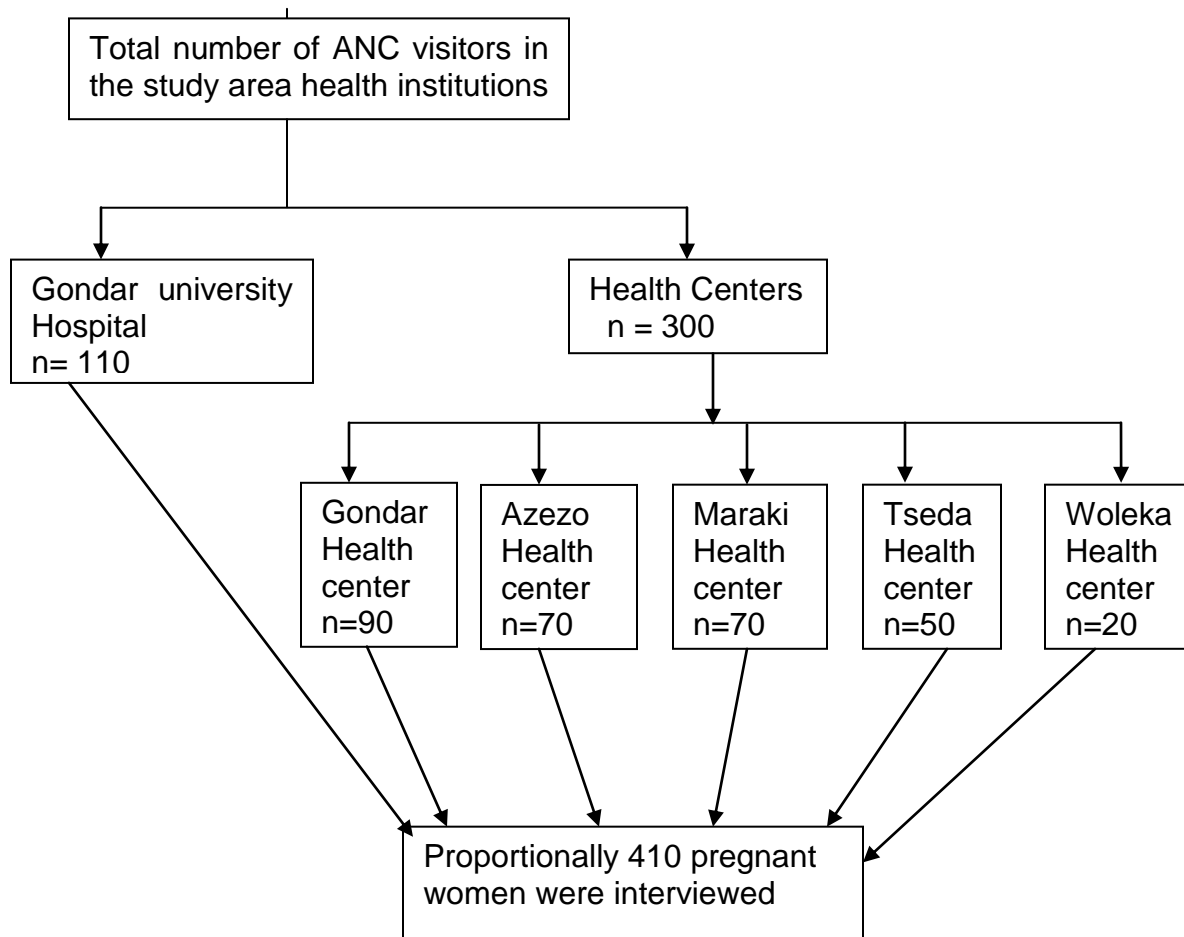

Supplement: MOESM1 [file 9491124]
